# Supplementary figures and images for: Quantifying of total volatile basic nitrogen (TVB-N) content in chicken using a colorimetric sensor array and nonlinear regression tool
Source: Royal Society of Chemistry journal article supplement (doi:10.1039/c5ay00596e), 2015-01-01

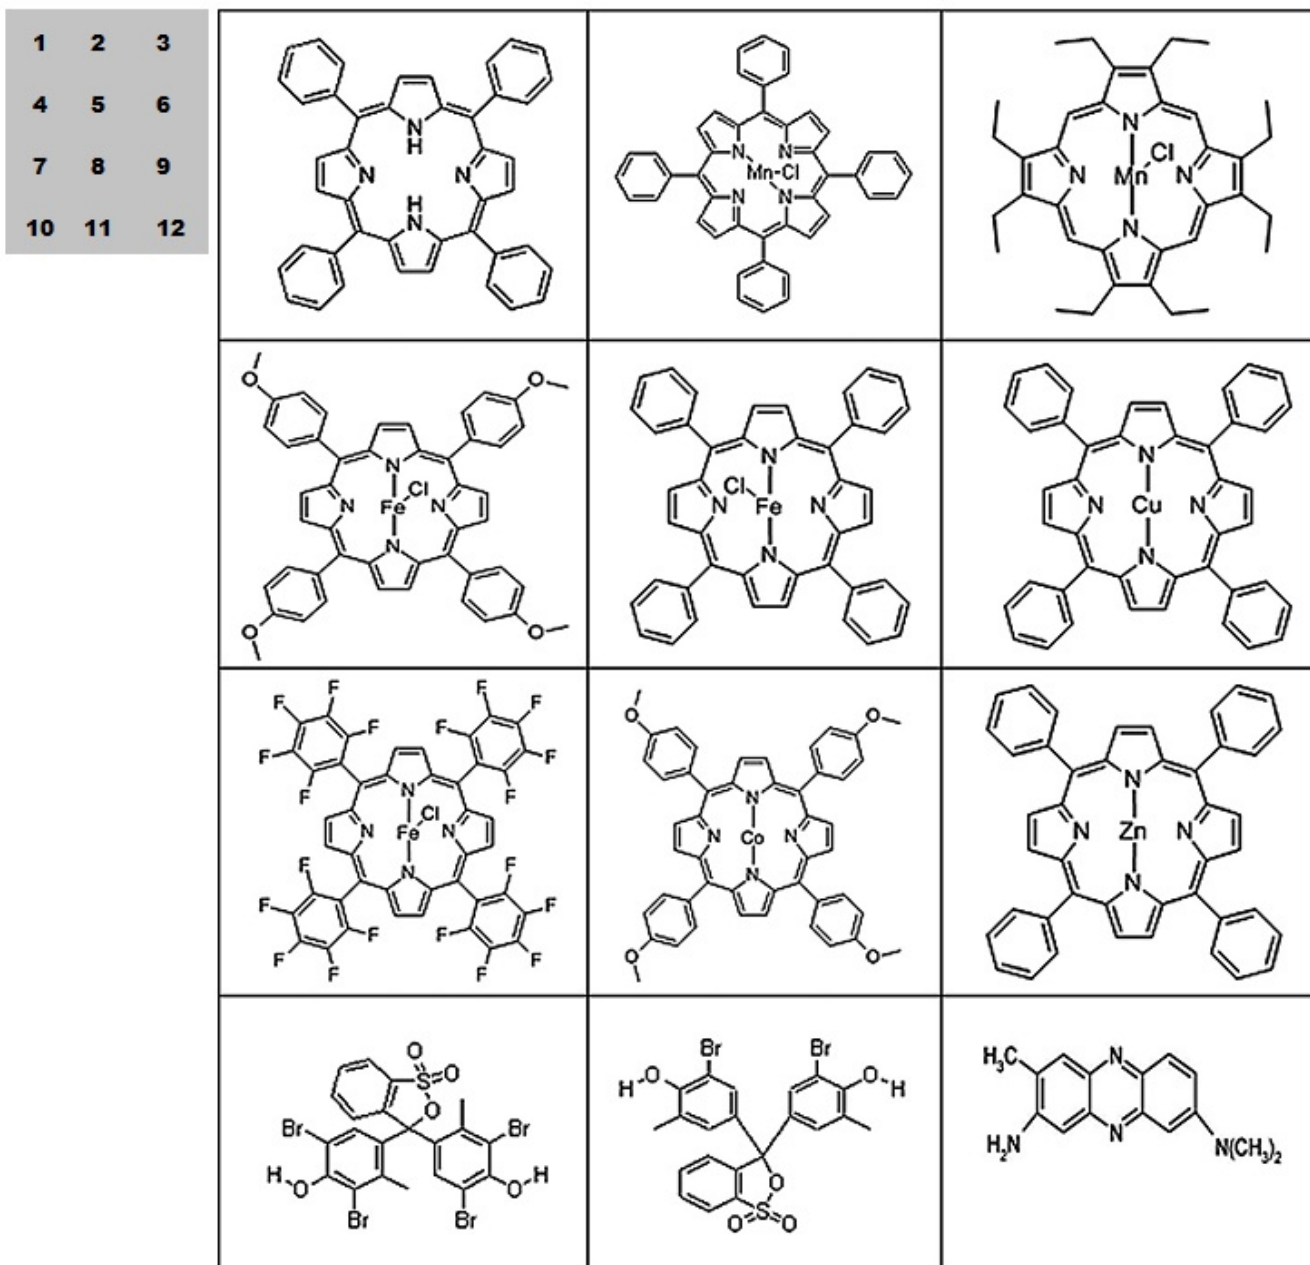

Supplement: c5ay00596e2.pdf [file c5ay00596e2.pdf]
